# Supplementary material
Source: PubMed Central journal article supplement (PMC3094135)

1 **SUPPLEMENTAL DATA**

2 **Supplementary Table 1. qPCR primer sequences.** MGAT (monoacylglycerol acyltransferase-2), ER  
 3 GPAT (endoplasmic reticulum glycerol-3-phosphate-3), MT GPAT (mitochondrial GPAT-1), DGAT  
 4 (diacylglycerol acyltransferase), MGL (monoacylglycerol lipase), PPAR $\alpha$  (peroxisome proliferator  
 5 activated receptor- $\alpha$ ), CB1 (cannabinoid receptor-1), ACADL (long chain acyl-CoA dehydrogenase),  
 6 ACOX1 (acyl-CoA oxidase-1), CCOX (cytochrome C oxidase), CD36 (cluster of Differentiation 36),  
 7 SRB1 (scavenger receptor class B type 1), NPC1L1 (Niemann-Pick C1 like protein 1), NADH De  
 8 (nicotine adenine dinucleotide dehydrogenase), SUCCDE (succinate dehydrogenase).  
 9

10

**qPCR primer sequences**

|                 |         |                                            |
|-----------------|---------|--------------------------------------------|
| $\beta$ -ACTIN  | forward | 5'-GGC TGT ATT CCC CTC CAT CG-3'           |
|                 | reverse | 5'-CCA GTT GGT AAC AAT GCC ATG T-3'        |
| MGAT2           | forward | 5'-TGG GAG CGC AGG TTA CAG A-3'            |
|                 | reverse | 5'-CAG GTG GCA TAC AGG ACA GA-3'           |
| ER GPAT (GPAT3) | forward | 5'-TAT CCA AAG AGA TGA GTC ACC CA-3'       |
|                 | reverse | 5'-CAC AAT GGC TTC CAA CCC CTT-3'          |
| MT GPAT (GPAT1) | forward | 5'- CTG CTT GCC TAC CTG AAG ACC-3'         |
|                 | reverse | 5'- GAT ACG GCG GTA TAG GTG CTT-3'         |
| DGAT1           | forward | 5'-TGT TCA CGT CAG ACA GTG GTT-3'          |
|                 | reverse | 5'-CCA CCA GGA TGC CAT ACT TGA T-3'        |
| DGAT2           | forward | 5'-TTC CTG GCA TAA GGC CCT ATT-3'          |
|                 | reverse | 5'-AGT CTA TGG TGT CTC GGT TGA C-3'        |
| MGL             | forward | 5'-CAG AGA GGC CCA CCT ACT TTT-3'          |
|                 | reverse | 5'-ATG CGC CCC AAG GTC ATA TTT-3'          |
| PPAR $\alpha$   | forward | 5'-TCG GCG AAC TAT TCG GCT G-3'            |
|                 | reverse | 5'-GCA CTT GTG AAA ACG GCA GT-3'           |
| CB1             | forward | 5'-GGG CAC CTT CAC GGT TCT G-3'            |
|                 | reverse | 5'-GTG GAA GTC AAC AAA GCT GTA GA-3'       |
| ACADL           | forward | 5'-TCC AGA GGT CAG TCA ACA TGA-3'          |
|                 | reverse | 5'-CCT GGT CAA TTT TTC GAG AGT CC-3'       |
| ACOX1           | forward | 5'-GCA CCC CGA CAT AGA GAG C-3'            |
|                 | reverse | 5'-TAA ACT CCG GGT AAC TGT GGA-3'          |
| CCOX            | forward | 5'-TCA ACG TGT TCC TCA AGT CGC-3'          |
|                 | reverse | 5'-AGG GTA TGG TTA CCG TCT CCC-3'          |
| CD36            | forward | 5'- TCC CCC TAC TAG AAG AAG TGG G-3'       |
|                 | reverse | 5'- TCC AAC AGA TTG GTT TCG TTC A-3'       |
| SRB1            | forward | 5'- TGA CAT CAG GGA CTC AGA GTA G-3'       |
|                 | reverse | 5'- TTT GGA GTG GTA GTA AAA AGG GC-3'      |
| NPC1L1          | forward | 5'- GCT TCT TCC GCA AGA TAT ACA CTC CC-3'  |
|                 | reverse | 5'- GAG GAT GCA GCA ATA GCC ACA TAA GAC-3' |
| NADH De         | forward | 5'-GGT ACT TTG CTT GCT TGA TGA GA-3'       |
|                 | reverse | 5'-TGG GAA GAT ATA CGG CTG AGG-3'          |
| SUCCDE          | forward | 5'-AAT TTG CCA TTT ACC GAT GGG A-3'        |
|                 | reverse | 5'-CTC CTG GGA CTC ATC CTT CTT-3'          |

11

12

13 **Supplementary figure 1. Expression of lipid synthetic genes in the small intestinal mucosa of WT,**  
14 **IFABP<sup>-/-</sup>, and LFABP<sup>-/-</sup> mice. Data are means ± SEM, n=3-4 per group.**

15

16

17

18

19

20

21

22

23

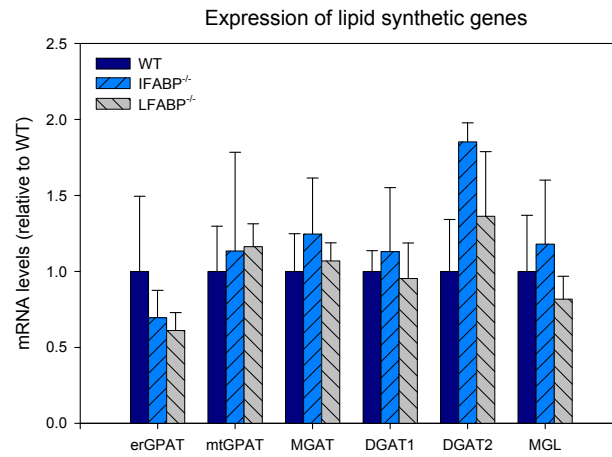

Supplement: supp_00229.2010_suppdata.pdf [file supp_00229.2010_suppdata.pdf]
